# Supplementary material for: Effects of Nanofillers Based on Cetyltrimethylammonium-Modified Clays in a Polypropylene Nanocomposite
Source: MDPI journal article supplement (doi:10.3390/polym14194110), 2022-09-30
Supplement: s1 [file s1]

Supporting Information

# Effects of Nanofillers based on Cetyltrimethylammonium-Modified Clays in a Polypropylene Nanocomposite

Hyeon-Ju Ryu<sup>1,#</sup>, Nguyen Thu Hang<sup>1,#</sup>, Sanoj Rejinold. N<sup>2</sup>, Byeongmoon Jeong<sup>1</sup>, Goeun Choi<sup>2,3,4,\*\*</sup> and Jin-Ho Choy<sup>2,5,6,7\*</sup>

<sup>1</sup>Department of Chemistry and Nanoscience, Ewha Womans University, Seoul 03760, Republic of Korea

<sup>2</sup>Intelligent Nanohybrid Materials Laboratory (INML), Institute of Tissue Regeneration Engineering (ITREN), Dankook University, Cheonan 31116, Republic of Korea

<sup>3</sup>College of Science and Technology, Dankook University, Cheonan 31116, Republic of Korea

<sup>4</sup>Department of Nanobiomedical Science and BK21 PLUS NBM Global Research Center for Regenerative Medicine, Dankook University, Cheonan 31116, Republic of Korea

<sup>5</sup>Division of Natural Sciences, the National Academy of Sciences, Seoul, Republic of Korea.

<sup>6</sup>Department of Pre-medical Course, College of Medicine, Dankook university, Cheonan 31116, Republic of Korea

<sup>7</sup>International Research Frontier Initiative (IRFI), Institute of Innovative Research, Tokyo Institute of Technology, Yokohama 226-8503, Japan

# These authors contributed equally to this work;

\* Corresponding authors.

Chair Professor Jin-Ho Choy

Tel: +82-41-550-3078

E-mail address: [jhchoy@dankook.ac.kr](mailto:jhchoy@dankook.ac.kr) (J.-H. Choy).

\*\* Corresponding author.

Professor Goeun Choi

Tel: +82-41-550-3464

E-mail address: [goeun.choi@dankook.ac.kr](mailto:goeun.choi@dankook.ac.kr) (G. Choi)

**Table S1.** CEC, particle sizes, layer charges and aspect ratios of un-modified clays.

| Host | Chemical composition                                                                                                                                               | Diameter of particles (nm) <sup>a</sup> | Cation exchange capacity (CEC) (meq/100g clay) <sup>b</sup> | Layer charge (e-/unit cell) <sup>b</sup> | Aspect ratio <sup>b</sup> |
|------|--------------------------------------------------------------------------------------------------------------------------------------------------------------------|-----------------------------------------|-------------------------------------------------------------|------------------------------------------|---------------------------|
| Mt   | $\text{Na}_{0.35}\text{K}_{0.01}\text{Ca}_{0.02}(\text{Si}_{3.89}\text{Al}_{0.11})(\text{Al}_{1.60}\text{Mg}_{0.32}\text{Fe}_{0.08})\text{O}_{10.01}(\text{OH})_2$ | ~ 1000                                  | 115                                                         | 0.40                                     | 250                       |
| Mica | $\text{Na}_{0.66}\text{Mg}_{2.68}(\text{Si}_{3.98}\text{Al}_{0.02})\text{O}_{10.02}\text{F}_{1.96}$                                                                | ~ 1500                                  | 120                                                         | 0.65                                     | 1000                      |
| Ht   | $\text{Na}_{0.70}[(\text{Si}_{8.00}\text{Mg}_{5.50}\text{Li}_{0.30})\text{O}_{20.00}(\text{OH})_4]$                                                                | ~ 60                                    | 75                                                          | 0.20                                     | 30                        |

<sup>a</sup> The particle sizes measured using a DLS.

<sup>b</sup> Information was obtained from clay industries.

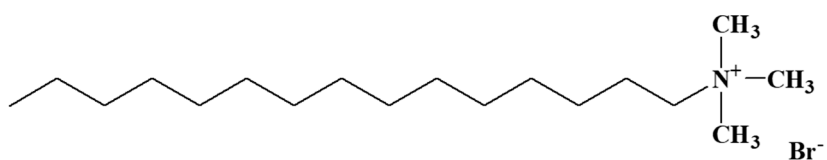

**(a) Cetyltrimethylammonium bromide (CTA,  $C_{19}H_{42}BrN$ )**

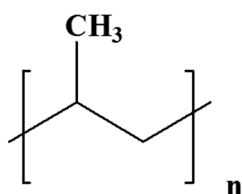

**(b) Polypropylene (PP,  $(C_3H_6)_n$ )**

**Figure S1.** The molecular structures of (a) cetyltrimethylammonium bromide and (b) polypropylene.

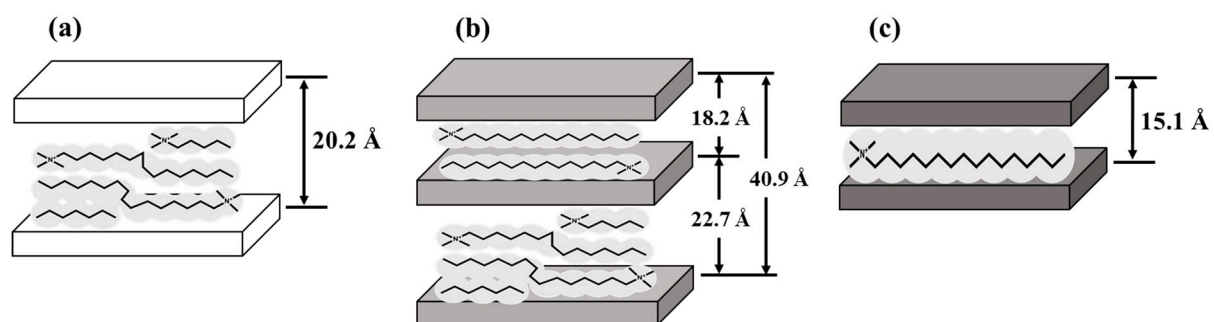

**Figure S2.** The cationic arrangements of (a) CTA-Mt, (b) CTA-Mica, (c) CTA-Ht.

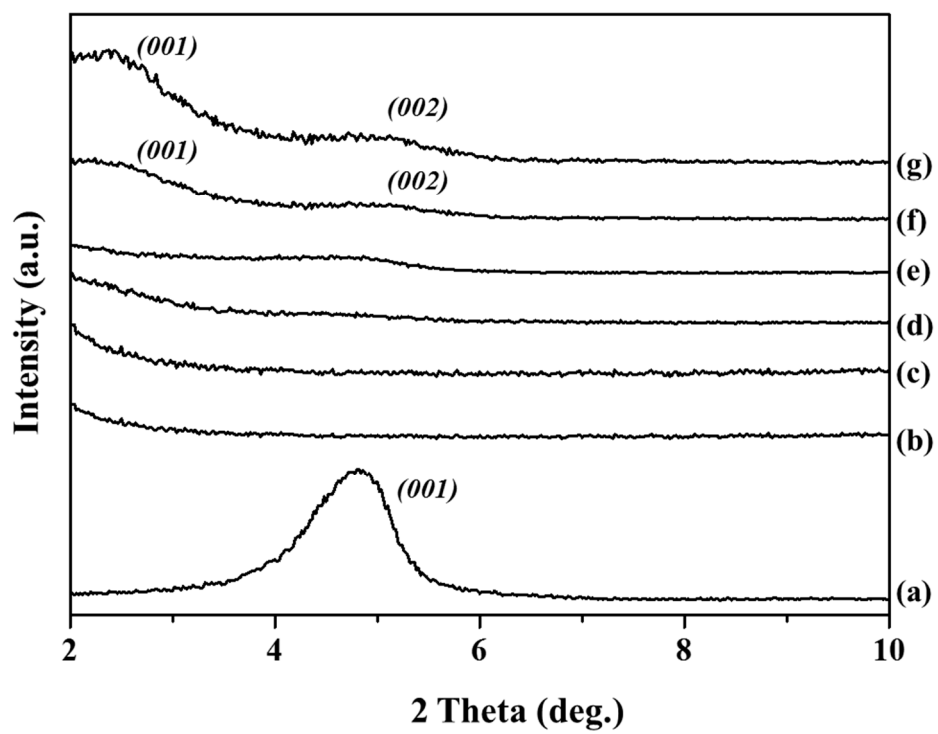

**Figure S3.** XRD patterns of (a) CTA-Mt (b) pristine PP, (c) 1 mass% (depending on content of CTA-Mt/PP nanocomposite), (d) 3 mass%, (e) 6 mass%, (f) 9 mass%, (g) 12 mass%.

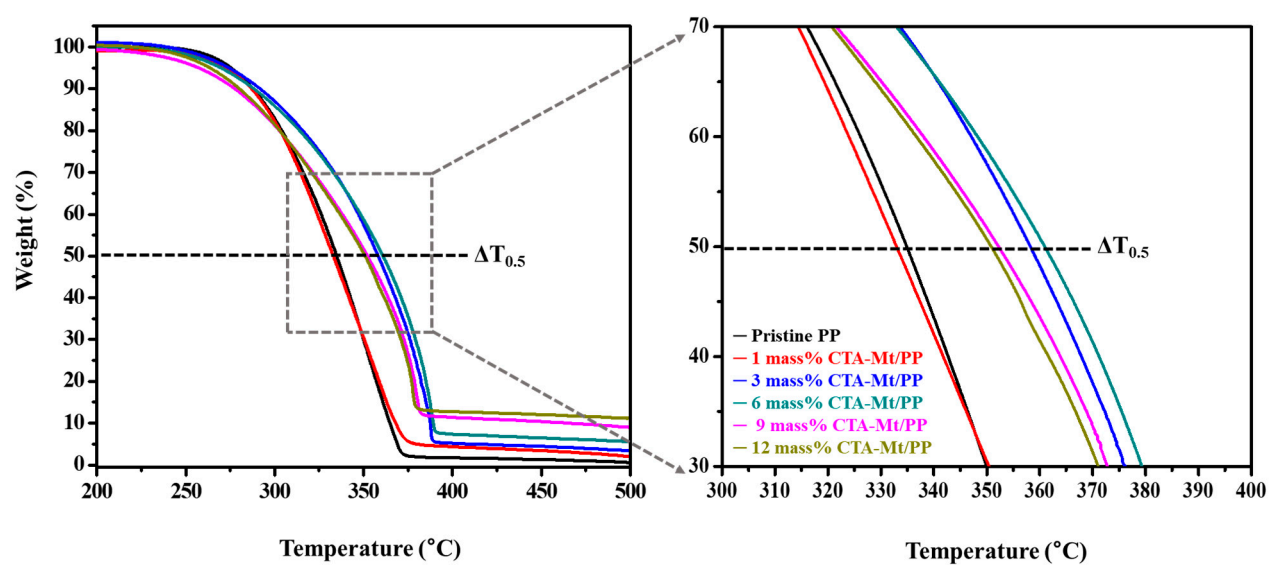

Figure S4. TGA curves of CTA-Mt/PP nanocomposites.

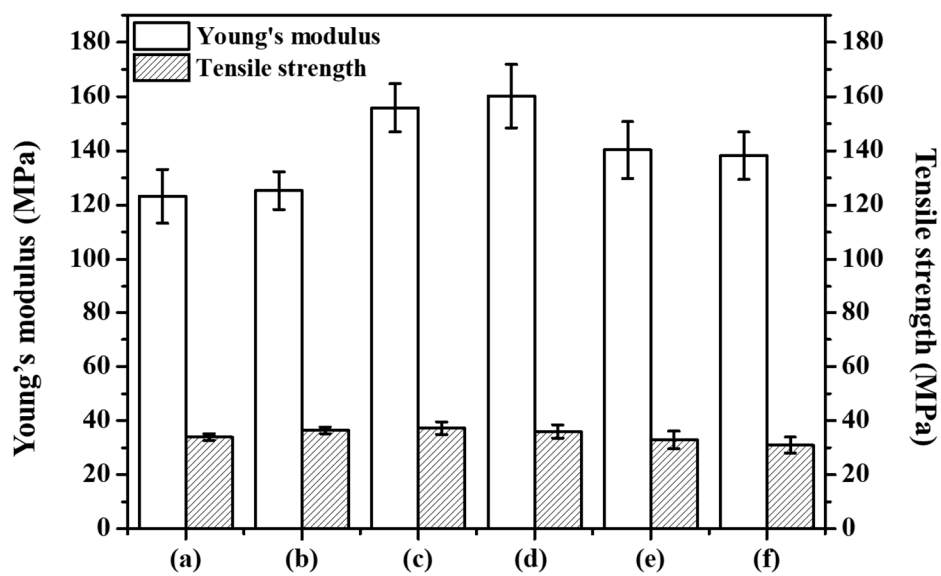

**Figure S5.** Young's modulus and tensile strength of (a) pristine PP, (b) 1 mass% (depending on content of C TA-Mt/PP nanocomposite), (c) 3 mass%, (d) 6 mass%, (e) 9 mass%, (f) 12 mass%.

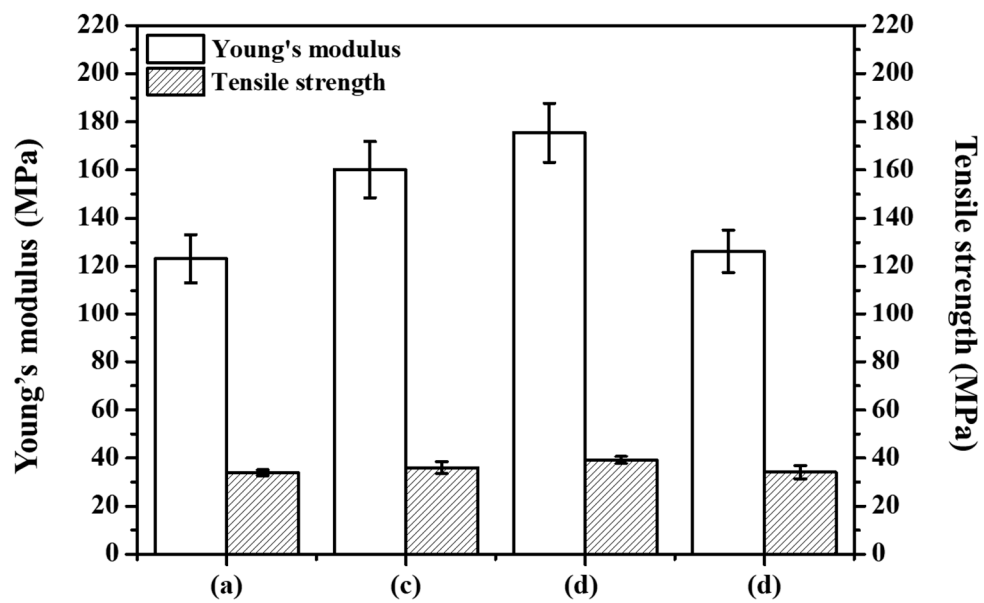

**Figure S6.** Young's modulus and tensile strength of (a) pristine PP, (b) 6 mass% CTA-Mt/PP, (c) 6 mass% CT A-Mica/PP and (d) CTA-Ht/PP nanocomposites.
